# Supplementary material for: Geotemporospatial and causal inferential epidemiological overview and survey of USA cannabis, cannabidiol and cannabinoid genotoxicity expressed in cancer incidence 2003–2017: part 1 – continuous bivariate analysis
Source: Arch Public Health. 2022 Mar 30;80:99. doi: 10.1186/s13690-022-00811-8 (PMC8966217; doi:10.1186/s13690-022-00811-8)
Supplement: Supplementary file 1 — Additional file 1: Supplementary Table 1. Substance Slopes for all Cancers. Supplementary Table 2. Cannabinoid Slopes for all Cancers. Supplementary Table 3. Slopes of Cancers by Analgesic Exposure. Supplementary Table 4. Slopes of Cancers by Cocaine Exposure. Supplementary Table 5. Slopes of Cancers by Cannabinol Exposure. Supplementary Table 6. Slopes of Cancers by Cannabichromene Exposure. Supplementary Table 7. Slopes of Cancers by Cannabigerol Exposure. [file 13690_2022_811_MOESM1_ESM.xlsx]

## Sheet: Contents
		Supplementary Table No.	Contents
		1	Substance Slopes for all Cancers
		2	Cannabinoid Slopes for all Cancers
		3	Slopes of Cancers by Analgesic Exposure
		4	Slopes of Cancers by Cocaine Exposure
		5	Slopes of Cancers by Cannabinol Exposure
		6	Slopes of Cancers by Cannabichromene Exposure
		7	Slopes of Cancers by Cannabigerol Exposure

## Sheet: ST1 Subs Slopes All Canc's
	Parameters							Model					E-Values
	Cancer	Substance	Term	Estimate	Std.Error	t_Statistic	P_Value	R.Squared	Adj.R.Squared	Sigma	t-Statistic	P-Value	E-Value - Point	E-Value - Lower
	Stomach	Cocaine	Substance	45.7579	6.42107	7.12621	2.43162e-12	0.0635753	0.0623234	1.21387	50.7829	2.43162e-12	1580223123657680	1.28681e+11
	Lung	Cigarettes	Substance	206.679	7.36358	28.0678	5.74629e-119	0.512957	0.512306	8.49523	787.799	5.74629e-119	8.24114e+09	1.76165e+09
	Ovary	Cocaine	Substance	27.182	4.50569	6.03281	2.53291e-09	0.0463986	0.0451238	0.851779	36.3948	2.53291e-09	8.18309e+12	6.66367e+08
	Prostate	AUD	Substance	294.081	26.9078	10.9292	6.73159e-26	0.1377	0.136547	11.403	119.447	6.73159e-26	3.11433e+10	4.66874e+08
	Colorectal	Cigarettes	Substance	102.766	4.26102	24.1177	1.59694e-95	0.437452	0.4367	4.91587	581.665	1.59694e-95	3.65472e+08	7.81245e+07
	Breast	Cocaine	Substance	126.752	24.1889	5.24009	2.08936e-07	0.0354095	0.0341199	4.57279	27.4586	2.08936e-07	1.80176e+11	1.46721e+07
	Kaposi	Cocaine	Substance	14.8095	4.40751	3.36006	0.000898102	0.0422388	0.0384976	0.40189	11.29	0.000898102	731644587638887	2.43424e+06
	Bladder	Cocaine	Substance	84.874	17.5732	4.82975	1.6585e-06	0.0302421	0.0289456	3.32212	23.3265	1.6585e-06	2.49953e+10	2.03542e+06
	Ovary	AUD	Substance	16.4306	1.96865	8.34613	3.39665e-16	0.0851919	0.0839689	0.834273	69.6578	3.39665e-16	1.21466e+08	1.82091e+06
	Colorectal	AUD	Substance	116.626	14.8666	7.8448	1.49793e-14	0.0760195	0.0747843	6.30016	61.5409	1.49793e-14	4.13931e+07	620529
	Bladder	AUD	Substance	59.4761	7.65777	7.76677	2.65455e-14	0.074627	0.0733898	3.24521	60.3227	2.65455e-14	3.50069e+07	524792
	Cervix	Analgesics	Substance	14.2232	2.99277	4.75252	2.40942e-06	0.0293107	0.028013	0.755705	22.5865	2.40942e-06	5.48619e+07	47624.9
	Thyroid	Cannabis	Substance	38.1264	3.61372	10.5504	2.35295e-24	0.129536	0.128372	2.96705	111.312	2.35295e-24	239564	27408.5
	Cervix	Cigarettes	Substance	8.11181	0.59503	13.6326	5.87503e-38	0.199013	0.197942	0.686476	185.848	5.87503e-38	93550.3	19997.2
	Liver	Cannabis	Substance	18.7374	1.98597	9.43491	4.82174e-20	0.106351	0.105156	1.63058	89.0176	4.82174e-20	69576.5	7959.93
	All_Cancer	Cigarettes	Substance	311.276	26.201	11.8803	6.10352e-30	0.158739	0.157614	30.2276	141.141	6.10352e-30	23483.5	5019.52
	Prostate	Cocaine	Substance	225.733	64.4301	3.50353	0.000486439	0.0161451	0.0148298	12.1802	12.2747	0.000486439	4.22007e+07	3436
	Ovary	Analgesics	Substance	13.0281	3.42133	3.80792	0.000151627	0.0190167	0.0177052	0.863921	14.5002	0.000151627	1.82329e+06	1582.29
	CLL	AUD	Substance	13.3118	2.76429	4.81563	1.77638e-06	0.0300708	0.0287741	1.17145	23.1903	1.77638e-06	61942	928.088
	Hodgkins	AUD	Substance	5.47672	1.13977	4.80512	1.86933e-06	0.0299436	0.0286468	0.483009	23.0892	1.86933e-06	60559.8	907.367
	Prostate	Cigarettes	Substance	92.4997	10.0923	9.16535	4.67853e-19	0.100965	0.0997636	11.6433	84.0036	4.67853e-19	2758.39	589.248
	Breast	Cannabis	Substance	38.4836	5.49339	7.00544	5.49552e-12	0.0615702	0.0603156	4.51036	49.0761	5.49552e-12	4709.85	538.419
	Vulva.&.Vagina	Cigarettes	Substance	2.82908	0.319257	8.86145	6.79259e-18	0.103116	0.101803	0.360141	78.5253	6.79259e-18	2543.88	524.663
	Bladder	Cannabis	Substance	25.5306	4.00134	6.38052	3.09241e-10	0.0516171	0.0503492	3.2853	40.711	3.09241e-10	2355.91	269.1
	Lung	Analgesics	Substance	156.245	47.8675	3.26412	0.00114797	0.0140439	0.0127258	12.087	10.6545	0.00114797	256893	222.507
	Ovary	Cigarettes	Substance	5.65444	0.727245	7.77515	2.49692e-14	0.074776	0.0735391	0.839009	60.4529	2.49692e-14	921.014	196.485
	Esophagus	AUD	Substance	8.11512	2.04651	3.96535	8.06289e-05	0.0214304	0.0200675	0.837745	15.724	8.06289e-05	13469.1	173.641
	Melanoma	Cocaine	Substance	21958.6	7636.06	2.87564	0.00414664	0.0109344	0.00961208	1443.56	8.26932	0.00414664	2.05447e+06	166.799
	NH_Lymphoma	AUD	Substance	17.1252	4.62002	3.70673	0.000225452	0.0180375	0.0167247	1.95787	13.7398	0.000225452	5725.47	85.3358
	Kidney	Cigarettes	Substance	10.5734	1.79831	5.87965	6.19422e-09	0.0441753	0.0428974	2.07467	34.5703	6.19422e-09	206.121	43.6624
	Pancreas	Cannabis	Substance	6.94567	1.51651	4.58002	5.44494e-06	0.0272786	0.0259781	1.24514	20.9766	5.44494e-06	319.826	36.1421
	Penis	Cigarettes	Substance	0.534848	0.117424	4.55486	6.90078e-06	0.0476119	0.045317	0.102349	20.7467	6.90078e-06	231.92	29.6474
	AML	Cannabis	Substance	2.7773	0.687637	4.03891	5.92422e-05	0.0213431	0.0200348	0.564585	16.3128	5.92422e-05	175.346	19.6059
	Brain	Cigarettes	Substance	3.1188	0.723398	4.31133	1.84001e-05	0.0242471	0.0229426	0.834571	18.5875	1.84001e-05	59.465	12.298
	Bladder	Cigarettes	Substance	11.8284	2.89198	4.09007	4.78017e-05	0.0218754	0.0205677	3.33642	16.7287	4.78017e-05	49.8607	10.2407
	Oropharynx	Cigarettes	Substance	4.68265	1.14541	4.08819	4.81835e-05	0.0218556	0.0205479	1.32144	16.7133	4.81835e-05	49.7858	10.2246
	Hodgkins	Cocaine	Substance	5.50312	2.58631	2.12779	0.0336812	0.00601636	0.0046875	0.48893	4.52748	0.0336812	56139.2	4.00015
	All_Cancer	AUD	Substance	174.31	77.506	2.24899	0.0248031	0.00671657	0.00538865	32.8455	5.05797	0.0248031	249.76	3.15763
	Hodgkins	Cigarettes	Substance	1.08134	0.423238	2.55493	0.0108178	0.00865133	0.00732599	0.488282	6.52766	0.0108178	14.4877	2.5879
	Esophagus	Cigarettes	Substance	1.68963	0.764709	2.2095	0.0274548	0.00675337	0.00537002	0.844004	4.88189	0.0274548	11.8432	1.76761
	Colorectal	Cocaine	Substance	65.7878	34.5865	1.90212	0.0575389	0.00481371	0.00348325	6.53842	3.61807	0.0575389	18945.2	1
	Liver	Cocaine	Substance	15.5575	9.10641	1.70841	0.0879753	0.00388679	0.00255509	1.72152	2.91866	0.0879753	7456.11	1
	All_Cancer	Cocaine	Substance	288.39	174.011	1.65731	0.0978769	0.00365858	0.00232657	32.896	2.74666	0.0978769	5830.03	1
	Liver	Analgesics	Substance	12.0755	6.81663	1.77148	0.0768888	0.00417783	0.00284651	1.72127	3.13812	0.0768888	1184.15	1
	Esophagus	Analgesics	Substance	5.63885	3.3982	1.65936	0.0974794	0.00382029	0.00243285	0.845249	2.75349	0.0974794	865.571	1
	Kaposi	Analgesics	Substance	2.63715	2.65012	0.995107	0.320624	0.00385321	-3.79854e-05	0.409865	0.990238	0.320624	697.54	1
	Prostate	Analgesics	Substance	52.8725	48.5921	1.08809	0.276907	0.0015803	0.000245514	12.27	1.18394	0.276907	100.426	1
	Kaposi	AUD	Substance	1.70933	1.83468	0.931677	0.352381	0.00337925	-0.000513798	0.409962	0.868022	0.352381	88.3853	1
	Brain	AUD	Substance	2.66799	1.99128	1.33983	0.180706	0.00239419	0.0010605	0.843865	1.79515	0.180706	35.0175	1
	Colorectal	Analgesics	Substance	16.2102	25.9494	0.624685	0.532368	0.000521427	-0.000814774	6.5525	0.390231	0.532368	18.4852	1
	NH_Lymphoma	Cocaine	Substance	4.17422	10.4502	0.399438	0.689684	0.000213258	-0.00112336	1.97556	0.159551	0.689684	13.1599	1
	Brain	Cannabis	Substance	1.52695	1.0275	1.48608	0.137679	0.00294377	0.0016108	0.843632	2.20844	0.137679	9.85684	1
	Lung	Cocaine	Substance	19.6332	64.3871	0.304924	0.760509	0.000124288	-0.00121244	12.1721	0.0929787	0.760509	8.14668	1
	Stomach	AUD	Substance	1.47991	2.95954	0.500048	0.617189	0.000334177	-0.00100227	1.25419	0.250048	0.617189	5.30073	1
	Oropharynx	Cannabis	Substance	1.46992	1.62644	0.903764	0.366411	0.00109077	-0.000244667	1.33539	0.81679	0.366411	4.8887	1
	Hodgkins	Cannabis	Substance	0.454922	0.59706	0.761936	0.446338	0.000775529	-0.000560332	0.490217	0.580546	0.446338	4.08378	1
	ALL	AUD	Substance	0.176982	0.724166	0.244394	0.807006	9.64827e-05	-0.00151887	0.279492	0.0597285	0.807006	2.9569	1
	Vulva.&.Vagina	Cannabis	Substance	0.235193	0.517302	0.454652	0.649504	0.000302557	-0.00116113	0.380223	0.206709	0.649504	2.90766	1
	NH_Lymphoma	Cannabis	Substance	1.21822	2.40598	0.506332	0.612773	0.000342626	-0.000993814	1.97543	0.256372	0.612773	2.90139	1
	ALL	Cannabis	Substance	0.14954	0.373972	0.39987	0.68939	0.000258247	-0.00135684	0.27947	0.159896	0.68939	2.63767	1
	CML	Cannabis	Substance	0.195106	0.541701	0.360174	0.71883	0.000192433	-0.00129096	0.388871	0.129725	0.71883	2.53441	1
	Kaposi	Cigarettes	Substance	0.205377	0.55149	0.372404	0.7099	0.000541444	-0.00336269	0.410545	0.138685	0.7099	2.52992	1
	NH_Lymphoma	Cigarettes	Substance	0.945838	1.71223	0.552401	0.580838	0.000407785	-0.000928569	1.97537	0.305147	0.580838	2.46493	1
	Testis	Cannabis	Substance	1.002	1.13382	0.883739	0.377121	0.00104302	-0.000292483	2.21626	0.780994	0.377121	2.38533	1
	CLL	Cigarettes	Substance	0.51053	1.03085	0.495251	0.620568	0.000327799	-0.00100866	1.18927	0.245274	0.620568	2.31838	1
	Stomach	Analgesics	Substance	0.344038	4.9677	0.0692549	0.944805	6.41204e-06	-0.00133048	1.2544	0.00479624	0.944805	1.88669	1
	Melanoma	Cannabis	Substance	181.262	1767.86	0.102531	0.918362	1.40542e-05	-0.00132283	1451.51	0.0105127	0.918362	1.48754	1
	Stomach	Cannabis	Substance	-0.0371445	1.5278	-0.0243124	0.98061	7.90233e-07	-0.00133611	1.2544	0.000591095	0.98061	1.19482	NA
	Esophagus	Cannabis	Substance	-0.460531	1.03917	-0.443174	0.657774	0.000273467	-0.00111891	0.846753	0.196403	0.657774	2.66531	NA
	Testis	Cocaine	Substance	-1.85356	3.52092	-0.526441	0.598738	0.000370372	-0.000966032	2.21701	0.277141	0.598738	3.70198	NA
	Breast	AUD	Substance	-6.47363	10.9842	-0.589358	0.555799	0.000464146	-0.000872132	4.65489	0.347342	0.555799	6.54877	NA
	CML	Cigarettes	Substance	-0.571097	0.344196	-1.65922	0.0975359	0.00406799	0.00259034	0.388116	2.75302	0.0975359	7.09274	NA
	Stomach	Cigarettes	Substance	-1.95611	1.08495	-1.80295	0.0717979	0.00432697	0.00299586	1.25168	3.25064	0.0717979	7.75745	NA
	Testis	Cigarettes	Substance	-3.63017	0.62175	-5.83862	7.84428e-09	0.0435877	0.0423091	2.16855	34.0895	7.84428e-09	8.64439	NA
	Esophagus	Cocaine	Substance	-1.61804	4.56411	-0.354513	0.723058	0.000175011	-0.0012175	0.846794	0.12568	0.723058	10.857	NA
	CLL	Cannabis	Substance	-2.75905	1.4452	-1.90912	0.0566295	0.004849	0.00351858	1.18658	3.64472	0.0566295	16.0787	NA
	Brain	Cocaine	Substance	-2.14482	4.46849	-0.479988	0.631376	0.000307911	-0.00102858	0.844746	0.230389	0.631376	19.6459	NA
	ALL	Cocaine	Substance	-0.725615	1.61284	-0.449898	0.652941	0.000326886	-0.00128809	0.27946	0.202409	0.652941	20.729	NA
	Kidney	Cannabis	Substance	-5.91819	2.57551	-2.29787	0.0218441	0.00700964	0.00568211	2.11462	5.28022	0.0218441	25.0225	NA
	Testis	AUD	Substance	-6.84514	1.38863	-4.92943	1.01631e-06	0.0314635	0.0301687	2.18225	24.2993	1.01631e-06	34.2214	NA
	Myeloma	Cigarettes	Substance	-2.95955	0.806735	-3.66855	0.000261229	0.0176744	0.0163611	0.930715	13.4583	0.000261229	35.6121	NA
	AML	Cigarettes	Substance	-1.80948	0.49024	-3.691	0.000239595	0.0178874	0.0165744	0.565581	13.6235	0.000239595	36.2575	NA
	Brain	Analgesics	Substance	-2.71607	3.34443	-0.812118	0.416982	0.000880956	-0.000454765	0.844504	0.659536	0.416982	36.8257	NA
	Melanoma	Analgesics	Substance	-5122.05	5745.29	-0.891521	0.372936	0.00106145	-0.000274027	1450.75	0.79481	0.372936	49.1955	NA
	ALL	Cigarettes	Substance	-0.990577	0.257929	-3.8405	0.000135428	0.0232733	0.0216954	0.276234	14.7494	0.000135428	51.7645	NA
	Penis	Cannabis	Substance	-0.380734	0.214046	-1.77875	0.0760131	0.00756627	0.00517487	0.104479	3.16394	0.0760131	54.6038	NA
	Myeloma	Cannabis	Substance	-3.50409	1.13652	-3.08318	0.00212329	0.0125491	0.0112289	0.93314	9.50598	0.00212329	60.4633	NA
	Thyroid	Cocaine	Substance	-13.6423	16.8149	-0.811324	0.417438	0.000879235	-0.000456488	3.17877	0.658247	0.417438	98.8415	NA
	Testis	Analgesics	Substance	-10.2605	1.86417	-5.50402	5.10343e-08	0.0389239	0.0376391	2.17383	30.2943	5.10343e-08	146.19	NA
	Lung	AUD	Substance	-59.9607	28.6406	-2.09355	0.036636	0.00582544	0.00449633	12.1373	4.38296	0.036636	178.738	NA
	Penis	Analgesics	Substance	-0.525967	0.584557	-0.899771	0.368764	0.00194701	-0.000457932	0.104774	0.809587	0.368764	192.241	NA
	Breast	Cigarettes	Substance	-23.5766	3.94261	-5.97995	3.45656e-09	0.0456259	0.04435	4.54851	35.7597	3.45656e-09	223.131	NA
	All_Cancer	Cannabis	Substance	-183.919	39.5718	-4.64771	3.96644e-06	0.0280681	0.0267687	32.4905	21.6012	3.96644e-06	344.784	NA
	Pancreas	Cigarettes	Substance	-7.35441	1.06075	-6.93323	8.89774e-12	0.0603838	0.0591276	1.22377	48.0697	8.89774e-12	473.845	NA
	Lung	Cannabis	Substance	-72.8339	14.5848	-4.99384	7.37208e-07	0.0322644	0.0309706	11.9748	24.9384	7.37208e-07	506.235	NA
	CML	AUD	Substance	-2.37242	0.982585	-2.41447	0.0160236	0.00857517	0.00710421	0.387237	5.82965	0.0160236	527.073	NA
	ALL	Analgesics	Substance	-1.85567	1.17512	-1.57914	0.114816	0.00401238	0.00240336	0.278945	2.49367	0.114816	850.9	NA
	Kaposi	Cannabis	Substance	-2.95894	0.8886	-3.32989	0.000996726	0.041515	0.0377709	0.402042	11.0882	0.000996726	1620.09	NA
	Vulva.&.Vagina	AUD	Substance	-2.94642	0.94886	-3.10522	0.00198003	0.0139212	0.0124774	0.377625	9.64239	0.00198003	2424.11	NA
	Ovary	Cannabis	Substance	-6.62886	1.03434	-6.40875	2.59543e-10	0.0520512	0.0507838	0.84925	41.0721	2.59543e-10	2430.83	NA
	Thyroid	AUD	Substance	-24.9391	7.44868	-3.34812	0.000854341	0.0147652	0.013448	3.1566	11.2099	0.000854341	2650.53	NA
	Melanoma	Cigarettes	Substance	-11227.6	1189.3	-9.44051	4.59699e-20	0.106464	0.105269	1372.08	89.1232	4.59699e-20	3427.13	NA
	Cervix	Cocaine	Substance	-7.4594	4.04821	-1.84264	0.0657771	0.00451869	0.00318783	0.765295	3.39532	0.0657771	14228	NA
	Liver	Cigarettes	Substance	-17.3073	1.35458	-12.7769	5.8974e-34	0.179148	0.178051	1.56276	163.248	5.8974e-34	47632.2	NA
	Oropharynx	Analgesics	Substance	-16.2883	5.25772	-3.09797	0.00202139	0.0126682	0.0113483	1.32763	9.59742	0.00202139	141159	NA
	Bladder	Analgesics	Substance	-41.3757	13.274	-3.11705	0.00189661	0.0128228	0.011503	3.35183	9.716	0.00189661	151206	NA
	Penis	AUD	Substance	-1.27658	0.36447	-3.50257	0.000510847	0.0287127	0.0263722	0.10336	12.268	0.000510847	152120	NA
	AML	AUD	Substance	-7.18132	1.32086	-5.43684	7.34786e-08	0.0380154	0.0367293	0.559755	29.5592	7.34786e-08	235131	NA
	All_Cancer	Analgesics	Substance	-436.735	129.534	-3.37159	0.000785764	0.0149698	0.0136529	32.7087	11.3676	0.000785764	378399	NA
	Thyroid	Cigarettes	Substance	-37.1893	2.39781	-15.5097	3.01791e-47	0.243336	0.242324	2.76631	240.55	3.01791e-47	411204	NA
	Cervix	Cannabis	Substance	-9.66823	0.864738	-11.1805	6.06122e-27	0.143189	0.142043	0.709995	125.004	6.06122e-27	481625	NA
	Kidney	Analgesics	Substance	-29.2273	8.33567	-3.50629	0.000481497	0.0161701	0.0148549	2.10485	12.2941	0.000481497	614857	NA
	Melanoma	AUD	Substance	-20410.1	3342.88	-6.10553	1.64527e-09	0.0474705	0.0461971	1416.65	37.2775	1.64527e-09	988372	NA
	Prostate	Cannabis	Substance	-179.632	13.4368	-13.3687	1.04746e-36	0.192853	0.191774	11.0323	178.721	1.04746e-36	5.44436e+06	NA
	Pancreas	Cocaine	Substance	-21.0335	6.63374	-3.17069	0.00158278	0.013262	0.0119428	1.25408	10.0533	0.00158278	8.50189e+06	NA
	Cervix	AUD	Substance	-12.784	1.74858	-7.31108	6.8247e-13	0.0666938	0.065446	0.741011	53.4518	6.8247e-13	1.31579e+07	NA
	Pancreas	Analgesics	Substance	-22.7869	4.92978	-4.62229	4.46975e-06	0.0277703	0.0264706	1.24482	21.3655	4.46975e-06	3.43114e+07	NA
	Colorectal	Cannabis	Substance	-107.187	6.95441	-15.4129	9.42685e-47	0.241038	0.240023	5.70993	237.556	9.42685e-47	5.24701e+07	NA
	Vulva.&.Vagina	Analgesics	Substance	-7.30798	1.55742	-4.69237	3.26347e-06	0.0312309	0.0298125	0.374295	22.0183	3.26347e-06	1.04068e+08	NA
	Pancreas	AUD	Substance	-24.8661	2.83695	-8.76507	1.24283e-17	0.0931425	0.0919301	1.20224	76.8264	1.24283e-17	2.98639e+08	NA
	Breast	Analgesics	Substance	-94.7942	18.11	-5.23435	2.15298e-07	0.0353347	0.034045	4.57297	27.3984	2.15298e-07	3.11451e+08	NA
	Liver	AUD	Substance	-35.2558	3.8607	-9.13197	6.17709e-19	0.100305	0.0991022	1.63609	83.3928	6.17709e-19	6.56618e+08	NA
	Oropharynx	AUD	Substance	-28.8908	2.97064	-9.72546	3.93572e-21	0.112255	0.111068	1.25889	94.5846	3.93572e-21	2.3485e+09	NA
	NH_Lymphoma	Analgesics	Substance	-44.8394	7.65082	-5.86074	6.90787e-09	0.043904	0.0426258	1.93191	34.3482	6.90787e-09	2.97682e+09	NA
	Kidney	AUD	Substance	-49.4253	4.67002	-10.5835	1.73126e-24	0.130244	0.129081	1.97906	112.011	1.73126e-24	1.48255e+10	NA
	AML	Analgesics	Substance	-14.4084	2.19788	-6.55557	1.03272e-10	0.0543323	0.053068	0.554988	42.9755	1.03272e-10	3.64123e+10	NA
	Hodgkins	Analgesics	Substance	-12.7747	1.88512	-6.7766	2.49449e-11	0.0578423	0.0565827	0.476013	45.9223	2.49449e-11	8.07571e+10	NA
	Myeloma	AUD	Substance	-23.4401	2.04344	-11.4709	3.58189e-28	0.149595	0.148459	0.865968	131.581	3.58189e-28	9.96657e+10	NA
	Myeloma	Analgesics	Substance	-26.412	3.59128	-7.35447	5.04493e-13	0.0674342	0.0661875	0.906836	54.0882	5.04493e-13	6.48058e+11	NA
	CLL	Cocaine	Substance	-35.202	6.15893	-5.71561	1.579e-08	0.0418464	0.0405654	1.16432	32.6681	1.579e-08	1.77737e+12	NA
	CML	Analgesics	Substance	-11.6204	1.55962	-7.45081	2.85247e-13	0.076098	0.0747272	0.373818	55.5146	2.85247e-13	3.8583e+12	NA
	CLL	Analgesics	Substance	-35.7068	4.52603	-7.88922	1.07929e-14	0.0768165	0.0755823	1.14287	62.2398	1.07929e-14	4.45207e+12	NA
	Penis	Cocaine	Substance	-3.22259	0.840688	-3.83328	0.000146045	0.0341965	0.0318692	0.103068	14.694	0.000146045	4.54895e+12	NA
	Thyroid	Analgesics	Substance	-95.892	12.0963	-7.92739	8.13379e-15	0.0775038	0.0762705	3.05444	62.8435	8.13379e-15	5.10856e+12	NA
	Vulva.&.Vagina	Cocaine	Substance	-11.8813	2.08332	-5.70309	1.75223e-08	0.0454565	0.0440589	0.371537	32.5253	1.75223e-08	8.69634e+12	NA
	Myeloma	Cocaine	Substance	-35.54	4.79435	-7.41289	3.35094e-13	0.0684362	0.0671908	0.906349	54.9509	3.35094e-13	6280953792584320	NA
	CML	Cocaine	Substance	-15.1593	2.1519	-7.0446	4.60321e-12	0.0685801	0.0671982	0.375336	49.6264	4.60321e-12	1.83192e+16	NA
	AML	Cocaine	Substance	-22.508	2.90456	-7.74919	3.01767e-14	0.0743147	0.0730771	0.549093	60.05	3.01767e-14	3.17022e+16	NA
	Kidney	Cocaine	Substance	-96.4009	10.6575	-9.04539	1.26521e-18	0.0985987	0.0973936	2.01474	81.8191	1.26521e-18	1.62501e+19	NA
	Oropharynx	Cocaine	Substance	-63.7125	6.67278	-9.54812	1.8289e-20	0.108639	0.107448	1.26146	91.1666	1.8289e-20	1.82742e+20	NA

## Sheet: ST2 Cannbd Slopes All Cancs
	Parameters							Model				E-Values
	Cancer	Substance	Term	Estimate	Std.Error	t_Statistic	P_Value	Adj.R.Squared	Sigma	t-Statistic	P-Value	E-Value - Point	E-Value - Lower
	Prostate	CBDRt	Cannabinoid Rate	575.789	40.1598	14.3374	2.28379e-41	0.214524	10.8759	205.562	2.28379e-41	1.67495e+21	2.34153e+18
	Thyroid	CBCRt	Cannabinoid Rate	156.723	14.5353	10.7822	2.70226e-25	0.133359	2.95855	116.256	2.70226e-25	1.72326e+21	2.74405e+17
	Bladder	CBDRt	Cannabinoid Rate	138.886	11.3748	12.21	2.14512e-31	0.165072	3.08048	149.083	2.14512e-31	1.31622e+18	1840033992186570
	Ovary	CBDRt	Cannabinoid Rate	35.7024	2.94444	12.1254	5.09457e-31	0.163151	0.797401	147.024	5.09457e-31	9.90547e+17	1384751977039090
	Liver	CBCRt	Cannabinoid Rate	76.1608	8.00371	9.51568	2.41667e-20	0.10679	1.62909	90.5482	2.41667e-20	5.98673e+18	953301760401046
	All_Cancer	CBDRt	Cannabinoid Rate	1081.11	115.094	9.39327	6.87247e-20	0.104317	31.1692	88.2334	6.87247e-20	102059956753333	1.42676e+11
	Colorectal	CBDRt	Cannabinoid Rate	213.858	22.9037	9.33727	1.10464e-19	0.103192	6.20269	87.1847	1.10464e-19	8.45556e+13	1.18206e+11
	Thyroid	CBGRt	Cannabinoid Rate	83.9005	7.26221	11.553	1.59471e-28	0.150285	2.92952	133.473	1.59471e-28	4.16555e+11	5.05025e+09
	Liver	CBGRt	Cannabinoid Rate	45.1026	3.94513	11.4325	5.22357e-28	0.147606	1.59143	130.701	5.22357e-28	3.17356e+11	3.84758e+09
	Breast	CBCRt	Cannabinoid Rate	149.242	22.2143	6.71826	3.64342e-11	0.0556463	4.52155	45.135	3.64342e-11	2.21599e+13	3.52864e+09
	Hodgkins	CBDRt	Cannabinoid Rate	13.1216	1.74614	7.51463	1.6327e-13	0.0689519	0.472882	56.4697	1.6327e-13	1.85063e+11	2.58711e+08
	Bladder	CBCRt	Cannabinoid Rate	97.3604	16.1873	6.01462	2.81968e-09	0.0448569	3.29479	36.1757	2.81968e-09	9.53542e+11	1.51838e+08
	Liver	CBNRt	Cannabinoid Rate	31.8217	2.33272	13.6415	5.3312e-38	0.198149	1.54353	186.089	5.3312e-38	2.81002e+08	1.90729e+07
	Thyroid	CBNRt	Cannabinoid Rate	58.0845	4.31145	13.4721	3.39874e-37	0.194189	2.85283	181.499	3.39874e-37	2.22632e+08	1.5111e+07
	Brain	CBDRt	Cannabinoid Rate	19.4078	3.03797	6.38842	2.94456e-10	0.0504708	0.82273	40.8119	2.94456e-10	4.20546e+09	5.87909e+06
	Lung	CBDRt	Cannabinoid Rate	258.529	43.9435	5.88321	6.06825e-09	0.0429486	11.9006	34.6121	6.06825e-09	7.70084e+08	1.07655e+06
	NH_Lymphoma	CBDRt	Cannabinoid Rate	41.7851	7.13387	5.85729	7.0462e-09	0.0425764	1.93196	34.3079	7.0462e-09	7.05864e+08	986773
	Pancreas	CBCRt	Cannabinoid Rate	28.7938	6.11253	4.71062	2.94412e-06	0.0275127	1.24416	22.19	2.94412e-06	2.80176e+09	446140
	Esophagus	CBDRt	Cannabinoid Rate	16.7282	3.10666	5.38464	9.84372e-08	0.037476	0.83027	28.9943	9.84372e-08	1.83507e+08	235028
	AML	CBCRt	Cannabinoid Rate	12.1345	2.76856	4.38296	1.33828e-05	0.0237358	0.563518	19.2103	1.33828e-05	6.47466e+08	103099
	Breast	CBGRt	Cannabinoid Rate	74.3296	11.2175	6.62621	6.58686e-11	0.0541815	4.52506	43.9067	6.58686e-11	6.20594e+06	75239.3
	Pancreas	CBGRt	Cannabinoid Rate	19.4504	3.04777	6.38183	3.06742e-10	0.0503694	1.22945	40.7277	3.06742e-10	3.57587e+06	43352.8
	Pancreas	CBNRt	Cannabinoid Rate	14.6579	1.83115	8.00475	4.56898e-15	0.0776725	1.21164	64.076	4.56898e-15	120796	8198.51
	AML	CBGRt	Cannabinoid Rate	7.53863	1.38766	5.43261	7.51716e-08	0.0366724	0.559772	29.5133	7.51716e-08	420171	5093.6
	AML	CBNRt	Cannabinoid Rate	6.28838	0.831294	7.56457	1.14379e-13	0.0698226	0.550056	57.2228	1.14379e-13	65939.6	4475.15
	Breast	CBNRt	Cannabinoid Rate	39.0905	6.88982	5.67366	1.99849e-08	0.039978	4.55891	32.1904	1.99849e-08	4894.55	331.749
	Breast	CBDRt	Cannabinoid Rate	58.3586	17.0595	3.42089	0.000658046	0.0140878	4.61997	11.7025	0.000658046	196436	274.111
	Bladder	CBGRt	Cannabinoid Rate	31.9672	8.28081	3.86039	0.000122989	0.0182234	3.34041	14.9026	0.000122989	12108.4	146.305
	Oropharynx	CBNRt	Cannabinoid Rate	9.33879	1.99018	4.69243	3.21032e-06	0.0272966	1.31688	22.0189	3.21032e-06	1269.18	85.6759
	Stomach	CBDRt	Cannabinoid Rate	12.7562	4.6084	2.76804	0.00577885	0.0088162	1.24803	7.66207	0.00577885	21902.6	30.1113
	CML	CBNRt	Cannabinoid Rate	2.37847	0.643281	3.6974	0.000235536	0.0184257	0.385023	13.6708	0.000235536	552.104	27.7295
	Testis	CBNRt	Cannabinoid Rate	8.05178	1.8461	4.36151	1.47286e-05	0.023497	2.18975	19.0228	1.47286e-05	56.2794	12.1404
	Oropharynx	CBGRt	Cannabinoid Rate	8.58093	3.29732	2.6024	0.00944074	0.00764796	1.33011	6.77247	0.00944074	708.471	8.0624
	Kidney	CBNRt	Cannabinoid Rate	8.67884	3.19133	2.71951	0.00668958	0.00846671	2.11166	7.39572	0.00668958	83.6984	5.1615
	Thyroid	THCRt	Cannabinoid Rate	2.82204	0.20956	13.4665	3.61634e-37	0.194056	2.85307	181.345	3.61634e-37	4.35486	3.7396
	Liver	THCRt	Cannabinoid Rate	1.51176	0.114	13.2611	3.35521e-36	0.189268	1.55205	175.857	3.35521e-36	4.28662	3.67929
	Pancreas	THCRt	Cannabinoid Rate	0.695957	0.0891701	7.80482	2.00934e-14	0.0740687	1.21401	60.9153	2.00934e-14	2.75904	2.31931
	AML	THCRt	Cannabinoid Rate	0.303226	0.0404263	7.50071	1.80231e-13	0.0687099	0.550385	56.2607	1.80231e-13	2.68762	2.25476
	Breast	THCRt	Cannabinoid Rate	1.96859	0.334325	5.88825	5.89392e-09	0.0430212	4.55167	34.6715	5.89392e-09	2.32775	1.92588
	Oropharynx	THCRt	Cannabinoid Rate	0.410801	0.096983	4.2358	2.5614e-05	0.0221192	1.32038	17.942	2.5614e-05	1.98634	1.60243
	CML	THCRt	Cannabinoid Rate	0.0974344	0.03168	3.07558	0.00218593	0.012377	0.386208	9.45919	0.00218593	1.82787	1.39499
	Testis	THCRt	Cannabinoid Rate	0.327241	0.0879563	3.72049	0.000213726	0.0168566	2.19718	13.8421	0.000213726	1.55284	1.33246
	Kidney	THCRt	Cannabinoid Rate	0.306518	0.155465	1.97162	0.0490209	0.00384006	2.11658	3.88729	0.0490209	1.54174	1.03334
	Kaposi	CBDRt	Cannabinoid Rate	4.26813	2.87052	1.48688	0.138277	0.00468926	0.408895	2.21082	0.138277	26686.1	1
	Brain	CBCRt	Cannabinoid Rate	5.47096	4.14605	1.31956	0.187385	0.000988662	0.843895	1.74124	0.187385	729.225	1
	Oropharynx	CBCRt	Cannabinoid Rate	6.65362	6.55983	1.0143	0.310769	3.84465e-05	1.3352	1.0288	0.310769	185.897	1
	CML	CBGRt	Cannabinoid Rate	1.72566	1.08666	1.58805	0.112745	0.00224958	0.388183	2.52189	0.112745	113.766	1
	Myeloma	CBNRt	Cannabinoid Rate	2.75841	1.41559	1.9486	0.0517171	0.00372046	0.936676	3.79703	0.0517171	28.657	1
	CML	CBCRt	Cannabinoid Rate	1.12378	2.18418	0.514511	0.607064	-0.00109049	0.388832	0.264721	0.607064	27.2392	1
	ALL	CBNRt	Cannabinoid Rate	0.781668	0.461525	1.69366	0.0908325	0.00300464	0.278861	2.86849	0.0908325	25.1246	1
	Melanoma	CBNRt	Cannabinoid Rate	3932.33	2188.94	1.79645	0.0728266	0.00296479	1448.4	3.22723	0.0728266	23.1482	1
	Hodgkins	CBCRt	Cannabinoid Rate	1.28405	2.40891	0.533041	0.594164	-0.000956679	0.490314	0.284133	0.594164	21.1655	1
	ALL	CBGRt	Cannabinoid Rate	0.715277	0.759506	0.941765	0.34668	-0.000182417	0.279306	0.886922	0.34668	20.0519	1
	Melanoma	CBGRt	Cannabinoid Rate	3502.69	3596	0.974051	0.330346	-6.83959e-05	1450.6	0.948775	0.330346	17.4872	1
	Testis	CBGRt	Cannabinoid Rate	5.16041	2.66655	1.93523	0.0533383	0.00365168	2.21189	3.74513	0.0533383	16.1974	1
	Vulva.&.Vagina	CBCRt	Cannabinoid Rate	0.816265	2.09047	0.390471	0.69631	-0.00124062	0.380238	0.152467	0.69631	13.5878	1
	Bladder	CBNRt	Cannabinoid Rate	5.41179	5.09453	1.06228	0.288454	0.000171438	3.37098	1.12843	0.288454	8.08688	1
	Vulva.&.Vagina	CBNRt	Cannabinoid Rate	0.578428	0.626519	0.923241	0.356208	-0.000215874	0.380044	0.852374	0.356208	7.45389	1
	NH_Lymphoma	CBCRt	Cannabinoid Rate	2.9959	9.70633	0.308654	0.757671	-0.00120938	1.97565	0.0952671	0.757671	7.41313	1
	Vulva.&.Vagina	CBGRt	Cannabinoid Rate	0.552732	1.04317	0.529859	0.596382	-0.00105264	0.380203	0.28075	0.596382	6.97027	1
	CLL	CBDRt	Cannabinoid Rate	1.49639	4.39183	0.34072	0.73341	-0.00118151	1.18938	0.11609	0.73341	5.73648	1
	Testis	CBCRt	Cannabinoid Rate	2.62886	4.6651	0.563517	0.573252	-0.000911978	2.21695	0.317551	0.573252	5.33222	1
	Melanoma	CBCRt	Cannabinoid Rate	1600.93	7131.05	0.224502	0.822428	-0.00126943	1451.47	0.050401	0.822428	4.89994	1
	ALL	CBCRt	Cannabinoid Rate	0.272897	1.51083	0.180627	0.85672	-0.00156272	0.279499	0.0326261	0.85672	4.29714	1
	Kidney	CBGRt	Cannabinoid Rate	0.676604	5.26051	0.128619	0.897693	-0.00131475	2.12205	0.0165429	0.897693	2.0074	1
	Bladder	THCRt	Cannabinoid Rate	0.440387	0.247265	1.78103	0.0753126	0.00289159	3.36639	3.17208	0.0753126	1.50378	1
	ALL	THCRt	Cannabinoid Rate	0.0330212	0.0224508	1.47083	0.141846	0.00187283	0.279019	2.16333	0.141846	1.46957	1
	Melanoma	THCRt	Cannabinoid Rate	169.86	106.434	1.59592	0.11093	0.0020611	1449.05	2.54695	0.11093	1.46646	1
	Vulva.&.Vagina	THCRt	Cannabinoid Rate	0.0346837	0.0306119	1.13301	0.257606	0.000414625	0.379924	1.28372	0.257606	1.39342	1
	Myeloma	THCRt	Cannabinoid Rate	0.0836331	0.0689064	1.21372	0.225237	0.00063127	0.938128	1.47312	0.225237	1.38724	1
	Penis	THCRt	Cannabinoid Rate	-0.0053237	0.0117181	-0.454314	0.64984	-0.00191133	0.10485	0.206402	0.64984	1.26983	NA
	Brain	THCRt	Cannabinoid Rate	-0.0698533	0.0620044	-1.12659	0.260279	0.000359279	0.844161	1.2692	0.260279	1.3686	NA
	Stomach	THCRt	Cannabinoid Rate	-0.112536	0.0920451	-1.22262	0.221858	0.000660183	1.25315	1.4948	0.221858	1.38913	NA
	Brain	CBGRt	Cannabinoid Rate	-0.0820888	2.09443	-0.0391939	0.968746	-0.00133484	0.844876	0.00153616	0.968746	1.41023	NA
	NH_Lymphoma	THCRt	Cannabinoid Rate	-0.319161	0.144652	-2.2064	0.0276593	0.00513794	1.96937	4.86819	0.0276593	1.58804	NA
	Hodgkins	THCRt	Cannabinoid Rate	-0.089931	0.0358705	-2.5071	0.0123835	0.00700738	0.48836	6.28556	0.0123835	1.64689	NA
	CLL	THCRt	Cannabinoid Rate	-0.224428	0.0869814	-2.58018	0.0100645	0.00749654	1.18421	6.65732	0.0100645	1.66114	NA
	Esophagus	THCRt	Cannabinoid Rate	-0.171918	0.0624111	-2.75461	0.00602501	0.00907936	0.842429	7.58787	0.00602501	1.69977	NA
	Penis	CBNRt	Cannabinoid Rate	-0.0314362	0.237972	-0.1321	0.894969	-0.00236749	0.104874	0.0174505	0.894969	1.95544	NA
	Kaposi	THCRt	Cannabinoid Rate	-0.191463	0.0504208	-3.79731	0.00018273	0.0496249	0.399558	14.4195	0.00018273	2.46605	NA
	Lung	THCRt	Cannabinoid Rate	-6.9703	0.857013	-8.13324	1.73551e-15	0.0800217	11.6678	66.1496	1.73551e-15	2.83754	NA
	All_Cancer	THCRt	Cannabinoid Rate	-21.2867	2.29213	-9.28685	1.6905e-19	0.102183	31.2063	86.2456	1.6905e-19	3.12537	NA
	Stomach	CBCRt	Cannabinoid Rate	-0.873903	6.16278	-0.141803	0.887274	-0.00130998	1.25438	0.0201082	0.887274	3.17679	NA
	Cervix	THCRt	Cannabinoid Rate	-0.53418	0.0528452	-10.1084	1.32728e-22	0.11901	0.719462	102.18	1.32728e-22	3.34267	NA
	Ovary	THCRt	Cannabinoid Rate	-0.737507	0.0581166	-12.6901	1.46995e-33	0.176053	0.79123	161.039	1.46995e-33	4.10152	NA
	Stomach	CBGRt	Cannabinoid Rate	-2.05663	3.10873	-0.661567	0.508453	-0.000751338	1.25403	0.437671	0.508453	8.3638	NA
	Colorectal	THCRt	Cannabinoid Rate	-8.56642	0.365585	-23.4321	1.74716e-91	0.422542	4.97726	549.064	1.74716e-91	9.0477	NA
	Prostate	THCRt	Cannabinoid Rate	-16.217	0.679658	-23.8606	5.24807e-94	0.431425	9.25322	569.327	5.24807e-94	9.32686	NA
	Stomach	CBNRt	Cannabinoid Rate	-2.555	1.89346	-1.34938	0.177623	0.0010947	1.25288	1.82083	0.177623	12.272	NA
	Brain	CBNRt	Cannabinoid Rate	-1.89279	1.27498	-1.48457	0.13808	0.00160482	0.843635	2.20394	0.13808	14.8898	NA
	Myeloma	CBGRt	Cannabinoid Rate	-2.54518	2.32603	-1.09422	0.274211	0.00026337	0.9383	1.19732	0.274211	23.0964	NA
	NH_Lymphoma	CBGRt	Cannabinoid Rate	-5.43461	4.89386	-1.11049	0.267143	0.000311248	1.97415	1.2332	0.267143	23.9797	NA
	Esophagus	CBCRt	Cannabinoid Rate	-2.52601	4.19141	-0.602664	0.546922	-0.000886454	0.846654	0.363204	0.546922	29.7008	NA
	Hodgkins	CBGRt	Cannabinoid Rate	-1.60525	1.21429	-1.32196	0.186585	0.000997108	0.489836	1.74758	0.186585	38.9547	NA
	NH_Lymphoma	CBNRt	Cannabinoid Rate	-6.94576	2.97514	-2.3346	0.0198283	0.00590661	1.96861	5.45034	0.0198283	49.088	NA
	CLL	CBNRt	Cannabinoid Rate	-4.60144	1.78974	-2.57101	0.0103325	0.00743442	1.18425	6.61009	0.0103325	68.144	NA
	Esophagus	CBGRt	Cannabinoid Rate	-3.42005	2.11269	-1.61881	0.105927	0.00224883	0.845327	2.62055	0.105927	78.9248	NA
	Penis	CBGRt	Cannabinoid Rate	-0.437976	0.408994	-1.07086	0.284854	0.000352623	0.104732	1.14674	0.284854	89.3936	NA
	Esophagus	CBNRt	Cannabinoid Rate	-3.57791	1.28473	-2.78495	0.00549461	0.00930886	0.842331	7.75596	0.00549461	94.9364	NA
	Testis	CBDRt	Cannabinoid Rate	-9.79629	2.58113	-3.79535	0.000159364	0.0175821	2.19637	14.4047	0.000159364	115.308	NA
	Hodgkins	CBNRt	Cannabinoid Rate	-2.31095	0.736315	-3.13853	0.00176465	0.0116782	0.48721	9.85036	0.00176465	149.325	NA
	Vulva.&.Vagina	CBDRt	Cannabinoid Rate	-2.31879	1.52344	-1.52207	0.128455	0.00192129	0.379637	2.31669	0.128455	518.204	NA
	CLL	CBGRt	Cannabinoid Rate	-7.721	2.93512	-2.63056	0.00869992	0.00784166	1.184	6.91983	0.00869992	754.97	NA
	Kaposi	CBNRt	Cannabinoid Rate	-3.71913	1.00905	-3.68578	0.000278296	0.0466829	0.400176	13.585	0.000278296	9418.13	NA
	Kidney	CBCRt	Cannabinoid Rate	-20.5922	10.3985	-1.9803	0.0480357	0.0038855	2.11653	3.92159	0.0480357	13998.2	NA
	CLL	CBCRt	Cannabinoid Rate	-11.6018	5.82843	-1.99055	0.0468939	0.00393941	1.18633	3.96229	0.0468939	14654.6	NA
	ALL	CBDRt	Cannabinoid Rate	-3.01528	1.14126	-2.64205	0.0084489	0.0095537	0.277943	6.98043	0.0084489	38766.1	NA
	Lung	CBNRt	Cannabinoid Rate	-142.277	17.6458	-8.06292	2.95231e-15	0.078733	11.676	65.0107	2.95231e-15	130858	NA
	Melanoma	CBDRt	Cannabinoid Rate	-18124.4	5318.67	-3.40769	0.000690198	0.0139708	1440.38	11.6124	0.000690198	187914	NA
	Cervix	CBDRt	Cannabinoid Rate	-9.73525	2.80984	-3.4647	0.000561067	0.0144791	0.760948	12.0042	0.000561067	227590	NA
	Cervix	CBNRt	Cannabinoid Rate	-9.79419	1.1025	-8.8836	4.76261e-18	0.0942273	0.729511	78.9183	4.76261e-18	404545	NA
	Myeloma	CBCRt	Cannabinoid Rate	-13.3152	4.58779	-2.90231	0.00381307	0.00981385	0.933808	8.42342	0.00381307	863608	NA
	All_Cancer	CBNRt	Cannabinoid Rate	-454.996	46.946	-9.6919	5.27222e-21	0.11038	31.0635	93.9329	5.27222e-21	1.22955e+06	NA
	Kaposi	CBGRt	Cannabinoid Rate	-5.95918	1.74227	-3.42035	0.0007277	0.0399658	0.401583	11.6988	0.0007277	1.46421e+06	NA
	Lung	CBGRt	Cannabinoid Rate	-199.011	29.2857	-6.79551	2.20495e-11	0.0568875	11.8136	46.1789	2.20495e-11	9.09217e+06	NA
	Penis	CBCRt	Cannabinoid Rate	-1.76298	0.86127	-2.04695	0.0412923	0.00760993	0.104351	4.19001	0.0412923	9.5049e+06	NA
	All_Cancer	CBGRt	Cannabinoid Rate	-570.952	78.9858	-7.22854	1.20756e-12	0.0640446	31.8622	52.2518	1.20756e-12	2.415e+07	NA
	Ovary	CBNRt	Cannabinoid Rate	-15.4195	1.19158	-12.9404	1.04359e-34	0.181826	0.788454	167.453	1.04359e-34	1.07142e+08	NA
	Penis	CBDRt	Cannabinoid Rate	-2.03559	0.622273	-3.27121	0.0011603	0.0227879	0.10355	10.7008	0.0011603	1.17503e+08	NA
	Thyroid	CBDRt	Cannabinoid Rate	-64.3924	11.5045	-5.59716	3.05936e-08	0.0389159	3.11559	31.3282	3.05936e-08	2.94515e+08	NA
	Pancreas	CBDRt	Cannabinoid Rate	-28.8032	4.54123	-6.34259	3.90889e-10	0.0497678	1.22984	40.2284	3.90889e-10	3.60515e+09	NA
	Liver	CBDRt	Cannabinoid Rate	-39.6678	6.20186	-6.39611	2.80749e-10	0.050589	1.67956	40.9102	2.80749e-10	4.31548e+09	NA
	Ovary	CBGRt	Cannabinoid Rate	-19.9807	2.03515	-9.81781	1.75351e-21	0.112969	0.820961	96.3895	1.75351e-21	8.31111e+09	NA
	All_Cancer	CBCRt	Cannabinoid Rate	-791.924	159.304	-4.97115	8.25807e-07	0.0306872	32.4251	24.7123	8.25807e-07	8.98014e+09	NA
	Lung	CBCRt	Cannabinoid Rate	-310.017	58.7209	-5.27951	1.69924e-07	0.0346361	11.9522	27.8732	1.69924e-07	3.56453e+10	NA
	Cervix	CBGRt	Cannabinoid Rate	-18.9053	1.77135	-10.6728	7.53907e-25	0.130998	0.71455	113.908	7.53907e-25	5.71857e+10	NA
	Oropharynx	CBDRt	Cannabinoid Rate	-38.8844	4.72439	-8.23056	8.26844e-16	0.0818177	1.27944	67.7422	8.26844e-16	2.05161e+12	NA
	Kaposi	CBCRt	Cannabinoid Rate	-12.4231	3.60642	-3.44472	0.000667825	0.0405653	0.401458	11.8661	0.000667825	3.39413e+12	NA
	CML	CBDRt	Cannabinoid Rate	-11.8318	1.52817	-7.74249	3.58088e-14	0.0803141	0.372688	59.9462	3.58088e-14	7.04372e+12	NA
	AML	CBDRt	Cannabinoid Rate	-17.5362	2.00746	-8.73554	1.5758e-17	0.0913608	0.543651	76.3096	1.5758e-17	1.11948e+13	NA
	Colorectal	CBNRt	Cannabinoid Rate	-172.376	7.6414	-22.5582	2.31479e-86	0.404077	5.05621	508.873	2.31479e-86	5.9492e+13	NA
	Ovary	CBCRt	Cannabinoid Rate	-29.4236	4.14814	-7.09321	3.04192e-12	0.0617723	0.844321	50.3137	3.04192e-12	118466158457387	NA
	Prostate	CBNRt	Cannabinoid Rate	-355.878	13.2322	-26.8948	5.41909e-112	0.490937	8.75557	723.331	5.41909e-112	2.31522e+16	NA
	Kidney	CBDRt	Cannabinoid Rate	-81.1174	7.25285	-11.1842	5.8498e-27	0.142124	1.96419	125.087	5.8498e-27	4.19202e+16	NA
	Myeloma	CBDRt	Cannabinoid Rate	-38.8894	3.16253	-12.2969	8.78046e-32	0.167051	0.856462	151.214	8.78046e-32	1.76292e+18	NA
	Prostate	CBGRt	Cannabinoid Rate	-466.668	25.2095	-18.5116	2.85446e-63	0.313272	10.1693	342.679	2.85446e-63	2.73564e+18	NA
	Colorectal	CBGRt	Cannabinoid Rate	-255.137	13.3028	-19.1792	5.49889e-67	0.328759	5.36623	367.843	5.49889e-67	1.23355e+19	NA
	Cervix	CBCRt	Cannabinoid Rate	-40.1131	3.47128	-11.5557	1.55301e-28	0.150345	0.706551	133.535	1.55301e-28	5.47295e+22	NA
	Prostate	CBCRt	Cannabinoid Rate	-725.882	54.1786	-13.3979	7.62063e-37	0.192457	11.0276	179.505	7.62063e-37	2.06636e+26	NA
	Colorectal	CBCRt	Cannabinoid Rate	-451.587	27.6452	-16.3351	1.58657e-51	0.26195	5.62695	266.836	1.58657e-51	1.04271e+32	NA

## Sheet: ST3 Analgesic Slopes
	Parameters								Model				E-Values
	No.	Cancer	Substance	Term	Estimate	Std.Error	t_Statistic	P_Value	Adj.R.Squared	S.D.	t-Statistic	P-Value	E-Value - Point	E-Value - Lower
	1	Cervix	Analgesics	Substance	14.2232	2.99277	4.75252	2.40942e-06	0.028013	0.755705	22.5865	2.40942e-06	5.48619e+07	47624.9
	2	Ovary	Analgesics	Substance	13.0281	3.42133	3.80792	0.000151627	0.0177052	0.863921	14.5002	0.000151627	1.82329e+06	1582.29
	3	Lung	Analgesics	Substance	156.245	47.8675	3.26412	0.00114797	0.0127258	12.087	10.6545	0.00114797	256893	222.507
	4	Liver	Analgesics	Substance	12.0755	6.81663	1.77148	0.0768888	0.00284651	1.72127	3.13812	0.0768888	1184.15	1
	5	Esophagus	Analgesics	Substance	5.63885	3.3982	1.65936	0.0974794	0.00243285	0.845249	2.75349	0.0974794	865.571	1
	6	Prostate	Analgesics	Substance	52.8725	48.5921	1.08809	0.276907	0.000245514	12.27	1.18394	0.276907	100.426	1
	7	Kaposi	Analgesics	Substance	2.63715	2.65012	0.995107	0.320624	-3.79854e-05	0.409865	0.990238	0.320624	697.54	1
	8	Colorectal	Analgesics	Substance	16.2102	25.9494	0.624685	0.532368	-0.000814774	6.5525	0.390231	0.532368	18.4852	1
	9	Stomach	Analgesics	Substance	0.344038	4.9677	0.0692549	0.944805	-0.00133048	1.2544	0.00479624	0.944805	1.88669	1
	10	Brain	Analgesics	Substance	-2.71607	3.34443	-0.812118	0.416982	-0.000454765	0.844504	0.659536	0.416982	36.8257	-
	11	Melanoma	Analgesics	Substance	-5122.05	5745.29	-0.891521	0.372936	-0.000274027	1450.75	0.79481	0.372936	49.1955	-
	12	Penis	Analgesics	Substance	-0.525967	0.584557	-0.899771	0.368764	-0.000457932	0.104774	0.809587	0.368764	192.241	-
	13	ALL	Analgesics	Substance	-1.85567	1.17512	-1.57914	0.114816	0.00240336	0.278945	2.49367	0.114816	850.9	-
	14	Oropharynx	Analgesics	Substance	-16.2883	5.25772	-3.09797	0.00202139	0.0113483	1.32763	9.59742	0.00202139	141159	-
	15	Bladder	Analgesics	Substance	-41.3757	13.274	-3.11705	0.00189661	0.011503	3.35183	9.716	0.00189661	151206	-
	16	All_Cancer	Analgesics	Substance	-436.735	129.534	-3.37159	0.000785764	0.0136529	32.7087	11.3676	0.000785764	378399	-
	17	Kidney	Analgesics	Substance	-29.2273	8.33567	-3.50629	0.000481497	0.0148549	2.10485	12.2941	0.000481497	614857	-
	18	Pancreas	Analgesics	Substance	-22.7869	4.92978	-4.62229	4.46975e-06	0.0264706	1.24482	21.3655	4.46975e-06	3.43114e+07	-
	19	Vulva.&.Vagina	Analgesics	Substance	-7.30798	1.55742	-4.69237	3.26347e-06	0.0298125	0.374295	22.0183	3.26347e-06	1.04068e+08	-
	20	Breast	Analgesics	Substance	-94.7942	18.11	-5.23435	2.15298e-07	0.034045	4.57297	27.3984	2.15298e-07	3.11451e+08	-
	21	Testis	Analgesics	Substance	-10.2605	1.86417	-5.50402	5.10343e-08	0.0376391	2.17383	30.2943	5.10343e-08	146.19	-
	22	NH_Lymphoma	Analgesics	Substance	-44.8394	7.65082	-5.86074	6.90787e-09	0.0426258	1.93191	34.3482	6.90787e-09	2.97682e+09	-
	23	AML	Analgesics	Substance	-14.4084	2.19788	-6.55557	1.03272e-10	0.053068	0.554988	42.9755	1.03272e-10	3.64123e+10	-
	24	Hodgkins	Analgesics	Substance	-12.7747	1.88512	-6.7766	2.49449e-11	0.0565827	0.476013	45.9223	2.49449e-11	8.07571e+10	-
	25	Myeloma	Analgesics	Substance	-26.412	3.59128	-7.35447	5.04493e-13	0.0661875	0.906836	54.0882	5.04493e-13	6.48058e+11	-
	26	CML	Analgesics	Substance	-11.6204	1.55962	-7.45081	2.85247e-13	0.0747272	0.373818	55.5146	2.85247e-13	3.8583e+12	-
	27	CLL	Analgesics	Substance	-35.7068	4.52603	-7.88922	1.07929e-14	0.0755823	1.14287	62.2398	1.07929e-14	4.45207e+12	-
	28	Thyroid	Analgesics	Substance	-95.892	12.0963	-7.92739	8.13379e-15	0.0762705	3.05444	62.8435	8.13379e-15	5.10856e+12	-

## Sheet: ST4 Cocaine Slopes
	Parameters								Model				E-Values
	No.	Cancer	Substance	Term	Estimate	Std.Error	t_Statistic	P_Value	Adj.R.Squared	S.D.	t-Statistic	P-Value	E-Value - Point	E-Value - Lower
	1	Stomach	Cocaine	Substance	45.7579	6.42107	7.12621	2.43162e-12	0.0623234	1.21387	50.7829	2.43162e-12	1580223123657680	1.28681e+11
	2	Ovary	Cocaine	Substance	27.182	4.50569	6.03281	2.53291e-09	0.0451238	0.851779	36.3948	2.53291e-09	8.18309e+12	6.66367e+08
	3	Breast	Cocaine	Substance	126.752	24.1889	5.24009	2.08936e-07	0.0341199	4.57279	27.4586	2.08936e-07	1.80176e+11	1.46721e+07
	4	Bladder	Cocaine	Substance	84.874	17.5732	4.82975	1.6585e-06	0.0289456	3.32212	23.3265	1.6585e-06	2.49953e+10	2.03542e+06
	5	Prostate	Cocaine	Substance	225.733	64.4301	3.50353	0.000486439	0.0148298	12.1802	12.2747	0.000486439	4.22007e+07	3436
	6	Kaposi	Cocaine	Substance	14.8095	4.40751	3.36006	0.000898102	0.0384976	0.40189	11.29	0.000898102	731644587638887	2.43424e+06
	7	Melanoma	Cocaine	Substance	21958.6	7636.06	2.87564	0.00414664	0.00961208	1443.56	8.26932	0.00414664	2.05447e+06	166.799
	8	Hodgkins	Cocaine	Substance	5.50312	2.58631	2.12779	0.0336812	0.0046875	0.48893	4.52748	0.0336812	56139.2	4.00015
	9	Colorectal	Cocaine	Substance	65.7878	34.5865	1.90212	0.0575389	0.00348325	6.53842	3.61807	0.0575389	18945.2	1
	10	Liver	Cocaine	Substance	15.5575	9.10641	1.70841	0.0879753	0.00255509	1.72152	2.91866	0.0879753	7456.11	1
	11	All_Cancer	Cocaine	Substance	288.39	174.011	1.65731	0.0978769	0.00232657	32.896	2.74666	0.0978769	5830.03	1
	12	NH_Lymphoma	Cocaine	Substance	4.17422	10.4502	0.399438	0.689684	-0.00112336	1.97556	0.159551	0.689684	13.1599	1
	13	Lung	Cocaine	Substance	19.6332	64.3871	0.304924	0.760509	-0.00121244	12.1721	0.0929787	0.760509	8.14668	1
	14	Esophagus	Cocaine	Substance	-1.61804	4.56411	-0.354513	0.723058	-0.0012175	0.846794	0.12568	0.723058	10.857	-
	15	ALL	Cocaine	Substance	-0.725615	1.61284	-0.449898	0.652941	-0.00128809	0.27946	0.202409	0.652941	20.729	-
	16	Brain	Cocaine	Substance	-2.14482	4.46849	-0.479988	0.631376	-0.00102858	0.844746	0.230389	0.631376	19.6459	-
	17	Testis	Cocaine	Substance	-1.85356	3.52092	-0.526441	0.598738	-0.000966032	2.21701	0.277141	0.598738	3.70198	-
	18	Thyroid	Cocaine	Substance	-13.6423	16.8149	-0.811324	0.417438	-0.000456488	3.17877	0.658247	0.417438	98.8415	-
	19	Cervix	Cocaine	Substance	-7.4594	4.04821	-1.84264	0.0657771	0.00318783	0.765295	3.39532	0.0657771	14228	-
	20	Pancreas	Cocaine	Substance	-21.0335	6.63374	-3.17069	0.00158278	0.0119428	1.25408	10.0533	0.00158278	8.50189e+06	-
	21	Penis	Cocaine	Substance	-3.22259	0.840688	-3.83328	0.000146045	0.0318692	0.103068	14.694	0.000146045	4.54895e+12	-
	22	Vulva.&.Vagina	Cocaine	Substance	-11.8813	2.08332	-5.70309	1.75223e-08	0.0440589	0.371537	32.5253	1.75223e-08	8.69634e+12	-
	23	CLL	Cocaine	Substance	-35.202	6.15893	-5.71561	1.579e-08	0.0405654	1.16432	32.6681	1.579e-08	1.77737e+12	-
	24	CML	Cocaine	Substance	-15.1593	2.1519	-7.0446	4.60321e-12	0.0671982	0.375336	49.6264	4.60321e-12	1.83192e+16	-
	25	Myeloma	Cocaine	Substance	-35.54	4.79435	-7.41289	3.35094e-13	0.0671908	0.906349	54.9509	3.35094e-13	6280953792584320	-
	26	AML	Cocaine	Substance	-22.508	2.90456	-7.74919	3.01767e-14	0.0730771	0.549093	60.05	3.01767e-14	3.17022e+16	-
	27	Kidney	Cocaine	Substance	-96.4009	10.6575	-9.04539	1.26521e-18	0.0973936	2.01474	81.8191	1.26521e-18	1.62501e+19	-
	28	Oropharynx	Cocaine	Substance	-63.7125	6.67278	-9.54812	1.8289e-20	0.107448	1.26146	91.1666	1.8289e-20	1.82742e+20	-

## Sheet: ST5 Cannabinol Slopes
	Parameters								Model				E-Values
	No.	Cancer	Substance	Term	Estimate	Std.Error	t_Statistic	P_Value	Adj.R.Squared	S.D.	t-Statistic	P-Value	E-Value - Point	E-Value - Lower
	1	Liver	Cannabinol	Cannabinoid	31.8217	2.33272	13.6415	5.3312e-38	0.198149	1.54353	186.089	5.3312e-38	2.81002e+08	1.90729e+07
	2	Thyroid	Cannabinol	Cannabinoid	58.0845	4.31145	13.4721	3.39874e-37	0.194189	2.85283	181.499	3.39874e-37	2.22632e+08	1.5111e+07
	3	Pancreas	Cannabinol	Cannabinoid	14.6579	1.83115	8.00475	4.56898e-15	0.0776725	1.21164	64.076	4.56898e-15	120796	8198.51
	4	AML	Cannabinol	Cannabinoid	6.28838	0.831294	7.56457	1.14379e-13	0.0698226	0.550056	57.2228	1.14379e-13	65939.6	4475.15
	5	Breast	Cannabinol	Cannabinoid	39.0905	6.88982	5.67366	1.99849e-08	0.039978	4.55891	32.1904	1.99849e-08	4894.55	331.749
	6	Oropharynx	Cannabinol	Cannabinoid	9.33879	1.99018	4.69243	3.21032e-06	0.0272966	1.31688	22.0189	3.21032e-06	1269.18	85.6759
	7	CML	Cannabinol	Cannabinoid	2.37847	0.643281	3.6974	0.000235536	0.0184257	0.385023	13.6708	0.000235536	552.104	27.7295
	8	Testis	Cannabinol	Cannabinoid	8.05178	1.8461	4.36151	1.47286e-05	0.023497	2.18975	19.0228	1.47286e-05	56.2794	12.1404
	9	Kidney	Cannabinol	Cannabinoid	8.67884	3.19133	2.71951	0.00668958	0.00846671	2.11166	7.39572	0.00668958	83.6984	5.1615
	10	Myeloma	Cannabinol	Cannabinoid	2.75841	1.41559	1.9486	0.0517171	0.00372046	0.936676	3.79703	0.0517171	28.657	1
	11	Melanoma	Cannabinol	Cannabinoid	3932.33	2188.94	1.79645	0.0728266	0.00296479	1448.4	3.22723	0.0728266	23.1482	1
	12	ALL	Cannabinol	Cannabinoid	0.781668	0.461525	1.69366	0.0908325	0.00300464	0.278861	2.86849	0.0908325	25.1246	1
	13	Bladder	Cannabinol	Cannabinoid	5.41179	5.09453	1.06228	0.288454	0.000171438	3.37098	1.12843	0.288454	8.08688	1
	14	Vulva.&.Vagina	Cannabinol	Cannabinoid	0.578428	0.626519	0.923241	0.356208	-0.000215874	0.380044	0.852374	0.356208	7.45389	1
	15	Penis	Cannabinol	Cannabinoid	-0.0314362	0.237972	-0.1321	0.894969	-0.00236749	0.104874	0.0174505	0.894969	1.95544	-
	16	Stomach	Cannabinol	Cannabinoid	-2.555	1.89346	-1.34938	0.177623	0.0010947	1.25288	1.82083	0.177623	12.272	-
	17	Brain	Cannabinol	Cannabinoid	-1.89279	1.27498	-1.48457	0.13808	0.00160482	0.843635	2.20394	0.13808	14.8898	-
	18	NH_Lymphoma	Cannabinol	Cannabinoid	-6.94576	2.97514	-2.3346	0.0198283	0.00590661	1.96861	5.45034	0.0198283	49.088	-
	19	CLL	Cannabinol	Cannabinoid	-4.60144	1.78974	-2.57101	0.0103325	0.00743442	1.18425	6.61009	0.0103325	68.144	-
	20	Esophagus	Cannabinol	Cannabinoid	-3.57791	1.28473	-2.78495	0.00549461	0.00930886	0.842331	7.75596	0.00549461	94.9364	-
	21	Hodgkins	Cannabinol	Cannabinoid	-2.31095	0.736315	-3.13853	0.00176465	0.0116782	0.48721	9.85036	0.00176465	149.325	-
	22	Kaposi	Cannabinol	Cannabinoid	-3.71913	1.00905	-3.68578	0.000278296	0.0466829	0.400176	13.585	0.000278296	9418.13	-
	23	Lung	Cannabinol	Cannabinoid	-142.277	17.6458	-8.06292	2.95231e-15	0.078733	11.676	65.0107	2.95231e-15	130858	-
	24	Cervix	Cannabinol	Cannabinoid	-9.79419	1.1025	-8.8836	4.76261e-18	0.0942273	0.729511	78.9183	4.76261e-18	404545	-
	25	All_Cancer	Cannabinol	Cannabinoid	-454.996	46.946	-9.6919	5.27222e-21	0.11038	31.0635	93.9329	5.27222e-21	1.22955e+06	-
	26	Ovary	Cannabinol	Cannabinoid	-15.4195	1.19158	-12.9404	1.04359e-34	0.181826	0.788454	167.453	1.04359e-34	1.07142e+08	-
	27	Colorectal	Cannabinol	Cannabinoid	-172.376	7.6414	-22.5582	2.31479e-86	0.404077	5.05621	508.873	2.31479e-86	5.9492e+13	-
	28	Prostate	Cannabinol	Cannabinoid	-355.878	13.2322	-26.8948	5.41909e-112	0.490937	8.75557	723.331	5.41909e-112	2.31522e+16	-

## Sheet: ST6 CBC Slopes
	Parameters								Model				E-Values
	No.	Cancer	Substance	Term	Estimate	Std.Error	t_Statistic	P_Value	Adj.R.Squared	S.D.	t-Statistic	P-Value	E-Value - Point	E-Value - Lower
	1	Thyroid	Cannabichromene	Cannabinoid	156.723	14.5353	10.7822	2.70226e-25	0.133359	2.95855	116.256	2.70226e-25	1.72326e+21	2.74405e+17
	2	Liver	Cannabichromene	Cannabinoid	76.1608	8.00371	9.51568	2.41667e-20	0.10679	1.62909	90.5482	2.41667e-20	5.98673e+18	953301760401046
	3	Breast	Cannabichromene	Cannabinoid	149.242	22.2143	6.71826	3.64342e-11	0.0556463	4.52155	45.135	3.64342e-11	2.21599e+13	3.52864e+09
	4	Bladder	Cannabichromene	Cannabinoid	97.3604	16.1873	6.01462	2.81968e-09	0.0448569	3.29479	36.1757	2.81968e-09	9.53542e+11	1.51838e+08
	5	Pancreas	Cannabichromene	Cannabinoid	28.7938	6.11253	4.71062	2.94412e-06	0.0275127	1.24416	22.19	2.94412e-06	2.80176e+09	446140
	6	AML	Cannabichromene	Cannabinoid	12.1345	2.76856	4.38296	1.33828e-05	0.0237358	0.563518	19.2103	1.33828e-05	6.47466e+08	103099
	7	Brain	Cannabichromene	Cannabinoid	5.47096	4.14605	1.31956	0.187385	0.000988662	0.843895	1.74124	0.187385	729.225	1
	8	Oropharynx	Cannabichromene	Cannabinoid	6.65362	6.55983	1.0143	0.310769	3.84465e-05	1.3352	1.0288	0.310769	185.897	1
	9	Testis	Cannabichromene	Cannabinoid	2.62886	4.6651	0.563517	0.573252	-0.000911978	2.21695	0.317551	0.573252	5.33222	1
	10	Hodgkins	Cannabichromene	Cannabinoid	1.28405	2.40891	0.533041	0.594164	-0.000956679	0.490314	0.284133	0.594164	21.1655	1
	11	CML	Cannabichromene	Cannabinoid	1.12378	2.18418	0.514511	0.607064	-0.00109049	0.388832	0.264721	0.607064	27.2392	1
	12	Vulva.&.Vagina	Cannabichromene	Cannabinoid	0.816265	2.09047	0.390471	0.69631	-0.00124062	0.380238	0.152467	0.69631	13.5878	1
	13	NH_Lymphoma	Cannabichromene	Cannabinoid	2.9959	9.70633	0.308654	0.757671	-0.00120938	1.97565	0.0952671	0.757671	7.41313	1
	14	Melanoma	Cannabichromene	Cannabinoid	1600.93	7131.05	0.224502	0.822428	-0.00126943	1451.47	0.050401	0.822428	4.89994	1
	15	ALL	Cannabichromene	Cannabinoid	0.272897	1.51083	0.180627	0.85672	-0.00156272	0.279499	0.0326261	0.85672	4.29714	1
	16	Stomach	Cannabichromene	Cannabinoid	-0.873903	6.16278	-0.141803	0.887274	-0.00130998	1.25438	0.0201082	0.887274	3.17679	-
	17	Esophagus	Cannabichromene	Cannabinoid	-2.52601	4.19141	-0.602664	0.546922	-0.000886454	0.846654	0.363204	0.546922	29.7008	-
	18	Kidney	Cannabichromene	Cannabinoid	-20.5922	10.3985	-1.9803	0.0480357	0.0038855	2.11653	3.92159	0.0480357	13998.2	-
	19	CLL	Cannabichromene	Cannabinoid	-11.6018	5.82843	-1.99055	0.0468939	0.00393941	1.18633	3.96229	0.0468939	14654.6	-
	20	Penis	Cannabichromene	Cannabinoid	-1.76298	0.86127	-2.04695	0.0412923	0.00760993	0.104351	4.19001	0.0412923	9.5049e+06	-
	21	Myeloma	Cannabichromene	Cannabinoid	-13.3152	4.58779	-2.90231	0.00381307	0.00981385	0.933808	8.42342	0.00381307	863608	-
	22	Kaposi	Cannabichromene	Cannabinoid	-12.4231	3.60642	-3.44472	0.000667825	0.0405653	0.401458	11.8661	0.000667825	3.39413e+12	-
	23	All_Cancer	Cannabichromene	Cannabinoid	-791.924	159.304	-4.97115	8.25807e-07	0.0306872	32.4251	24.7123	8.25807e-07	8.98014e+09	-
	24	Lung	Cannabichromene	Cannabinoid	-310.017	58.7209	-5.27951	1.69924e-07	0.0346361	11.9522	27.8732	1.69924e-07	3.56453e+10	-
	25	Ovary	Cannabichromene	Cannabinoid	-29.4236	4.14814	-7.09321	3.04192e-12	0.0617723	0.844321	50.3137	3.04192e-12	118466158457387	-
	26	Cervix	Cannabichromene	Cannabinoid	-40.1131	3.47128	-11.5557	1.55301e-28	0.150345	0.706551	133.535	1.55301e-28	5.47295e+22	-
	27	Prostate	Cannabichromene	Cannabinoid	-725.882	54.1786	-13.3979	7.62063e-37	0.192457	11.0276	179.505	7.62063e-37	2.06636e+26	-
	28	Colorectal	Cannabichromene	Cannabinoid	-451.587	27.6452	-16.3351	1.58657e-51	0.26195	5.62695	266.836	1.58657e-51	1.04271e+32	-

## Sheet: ST7 Cannabigerol Slopes
	Parameters								Model				E-Values
	No.	Cancer	Substance	Term	Estimate	Std.Error	t_Statistic	P_Value	Adj.R.Squared	S.D.	t-Statistic	P-Value	E-Value - Point	E-Value - Lower
	1	Thyroid	Cannabigerol	Cannabinoid	83.9005	7.26221	11.553	1.59471e-28	0.150285	2.92952	133.473	1.59471e-28	4.16555e+11	5.05025e+09
	2	Liver	Cannabigerol	Cannabinoid	45.1026	3.94513	11.4325	5.22357e-28	0.147606	1.59143	130.701	5.22357e-28	3.17356e+11	3.84758e+09
	3	Breast	Cannabigerol	Cannabinoid	74.3296	11.2175	6.62621	6.58686e-11	0.0541815	4.52506	43.9067	6.58686e-11	6.20594e+06	75239.3
	4	Pancreas	Cannabigerol	Cannabinoid	19.4504	3.04777	6.38183	3.06742e-10	0.0503694	1.22945	40.7277	3.06742e-10	3.57587e+06	43352.8
	5	AML	Cannabigerol	Cannabinoid	7.53863	1.38766	5.43261	7.51716e-08	0.0366724	0.559772	29.5133	7.51716e-08	420171	5093.6
	6	Bladder	Cannabigerol	Cannabinoid	31.9672	8.28081	3.86039	0.000122989	0.0182234	3.34041	14.9026	0.000122989	12108.4	146.305
	7	Oropharynx	Cannabigerol	Cannabinoid	8.58093	3.29732	2.6024	0.00944074	0.00764796	1.33011	6.77247	0.00944074	708.471	8.0624
	8	Testis	Cannabigerol	Cannabinoid	5.16041	2.66655	1.93523	0.0533383	0.00365168	2.21189	3.74513	0.0533383	16.1974	1
	9	CML	Cannabigerol	Cannabinoid	1.72566	1.08666	1.58805	0.112745	0.00224958	0.388183	2.52189	0.112745	113.766	1
	10	Melanoma	Cannabigerol	Cannabinoid	3502.69	3596	0.974051	0.330346	-6.83959e-05	1450.6	0.948775	0.330346	17.4872	1
	11	ALL	Cannabigerol	Cannabinoid	0.715277	0.759506	0.941765	0.34668	-0.000182417	0.279306	0.886922	0.34668	20.0519	1
	12	Vulva.&.Vagina	Cannabigerol	Cannabinoid	0.552732	1.04317	0.529859	0.596382	-0.00105264	0.380203	0.28075	0.596382	6.97027	1
	13	Kidney	Cannabigerol	Cannabinoid	0.676604	5.26051	0.128619	0.897693	-0.00131475	2.12205	0.0165429	0.897693	2.0074	1
	14	Brain	Cannabigerol	Cannabinoid	-0.0820888	2.09443	-0.0391939	0.968746	-0.00133484	0.844876	0.00153616	0.968746	1.41023	-
	15	Stomach	Cannabigerol	Cannabinoid	-2.05663	3.10873	-0.661567	0.508453	-0.000751338	1.25403	0.437671	0.508453	8.3638	-
	16	Penis	Cannabigerol	Cannabinoid	-0.437976	0.408994	-1.07086	0.284854	0.000352623	0.104732	1.14674	0.284854	89.3936	-
	17	Myeloma	Cannabigerol	Cannabinoid	-2.54518	2.32603	-1.09422	0.274211	0.00026337	0.9383	1.19732	0.274211	23.0964	-
	18	NH_Lymphoma	Cannabigerol	Cannabinoid	-5.43461	4.89386	-1.11049	0.267143	0.000311248	1.97415	1.2332	0.267143	23.9797	-
	19	Hodgkins	Cannabigerol	Cannabinoid	-1.60525	1.21429	-1.32196	0.186585	0.000997108	0.489836	1.74758	0.186585	38.9547	-
	20	Esophagus	Cannabigerol	Cannabinoid	-3.42005	2.11269	-1.61881	0.105927	0.00224883	0.845327	2.62055	0.105927	78.9248	-
	21	CLL	Cannabigerol	Cannabinoid	-7.721	2.93512	-2.63056	0.00869992	0.00784166	1.184	6.91983	0.00869992	754.97	-
	22	Kaposi	Cannabigerol	Cannabinoid	-5.95918	1.74227	-3.42035	0.0007277	0.0399658	0.401583	11.6988	0.0007277	1.46421e+06	-
	23	Lung	Cannabigerol	Cannabinoid	-199.011	29.2857	-6.79551	2.20495e-11	0.0568875	11.8136	46.1789	2.20495e-11	9.09217e+06	-
	24	All_Cancer	Cannabigerol	Cannabinoid	-570.952	78.9858	-7.22854	1.20756e-12	0.0640446	31.8622	52.2518	1.20756e-12	2.415e+07	-
	25	Ovary	Cannabigerol	Cannabinoid	-19.9807	2.03515	-9.81781	1.75351e-21	0.112969	0.820961	96.3895	1.75351e-21	8.31111e+09	-
	26	Cervix	Cannabigerol	Cannabinoid	-18.9053	1.77135	-10.6728	7.53907e-25	0.130998	0.71455	113.908	7.53907e-25	5.71857e+10	-
	27	Prostate	Cannabigerol	Cannabinoid	-466.668	25.2095	-18.5116	2.85446e-63	0.313272	10.1693	342.679	2.85446e-63	2.73564e+18	-
	28	Colorectal	Cannabigerol	Cannabinoid	-255.137	13.3028	-19.1792	5.49889e-67	0.328759	5.36623	367.843	5.49889e-67	1.23355e+19	-
